# Supplementary material for: Dynamics of Loneliness Among Older Adults During the COVID-19 Pandemic: Pilot Study of Ecological Momentary Assessment With Network Analysis
Source: Frontiers journal article supplement (doi:10.3389/fdgth.2022.814179), 2022-02-07
Supplement: Data_Sheet_1.PDF [file Data_Sheet_1.PDF]

Supplementary Table 1: EMA Pilot Data Pearson's Correlations

|                                         | Worried  |          | Happiness |          | Anxiety  |          | Restlessness |          | Fatigue  |          | Lack of Concentration |          | Irritability |          | Loneliness |          |
|-----------------------------------------|----------|----------|-----------|----------|----------|----------|--------------|----------|----------|----------|-----------------------|----------|--------------|----------|------------|----------|
|                                         | <i>r</i> | <i>p</i> | <i>r</i>  | <i>p</i> | <i>r</i> | <i>p</i> | <i>r</i>     | <i>p</i> | <i>r</i> | <i>p</i> | <i>r</i>              | <i>p</i> | <i>r</i>     | <i>p</i> | <i>r</i>   | <i>p</i> |
| How worried were you?                   |          |          | -.432*    | 0.045    | .473*    | 0.026    | 0.382        | 0.080    | 0.197    | 0.379    | 0.180                 | 0.422    | .458*        | 0.032    | 0.054      | 0.811    |
| How happy vs. sad were you?             | -.432*   | 0.045    |           |          | -.696**  | 0.000    | -.614**      | 0.002    | -.525*   | 0.012    | -.663**               | 0.001    | -.633**      | 0.002    | -.559**    | 0.007    |
| How relaxed vs. anxious were you?       | .473*    | 0.026    | -.696**   | 0.000    |          |          | .849**       | 0.000    | .435*    | 0.043    | .629**                | 0.002    | .760**       | 0.000    | 0.360      | 0.100    |
| How fidgety or restless were you?       | 0.382    | 0.080    | -.614**   | 0.002    | .849**   | 0.000    |              |          | 0.149    | 0.508    | 0.397                 | 0.068    | .609**       | 0.003    | .468*      | 0.028    |
| How fatigued/tired were you?            | 0.197    | 0.379    | -.525*    | 0.012    | .435*    | 0.043    | 0.149        | 0.508    |          |          | .677**                | 0.001    | .516*        | 0.014    | 0.372      | 0.088    |
| How were you able to concentrate/focus? | 0.180    | 0.422    | -.663**   | 0.001    | .629**   | 0.002    | 0.397        | 0.068    | .677**   | 0.001    |                       |          | .654**       | 0.001    | 0.363      | 0.097    |
| How irritable were you?                 | .458*    | 0.032    | -.633**   | 0.002    | .760**   | 0.000    | .609**       | 0.003    | .516*    | 0.014    | .654**                | 0.001    |              |          | 0.421      | 0.051    |
| How lonely were you?                    | 0.054    | 0.811    | -.559**   | 0.007    | 0.360    | 0.100    | .468*        | 0.028    | 0.372    | 0.088    | 0.363                 | 0.097    | 0.421        | 0.051    |            |          |

\* Correlation is significant at the 0.05 level (2-tailed).

\*\* Correlation is significant at the 0.01 level (2-tailed).

**Worried:** Positively correlated with anxiety and irritability; negatively correlated with happiness

**Happiness:** Negatively correlated with worry, anxiety, restlessness, fatigue, concentration, irritability, and loneliness

**Anxiety:** Positively correlated with worry, restlessness, fatigue, lack of concentration, and irritability; negatively correlated with happiness

**Restlessness:** Positively correlated with anxiety, irritability and loneliness; negatively correlated with happiness

**Fatigue:** Positively correlated with anxiety, lack of concentration, and irritability; negatively correlated with happiness

**Lack of concentration:** Positively correlated with anxiety, fatigue, and irritability; negatively correlated with happiness

**Irritability:** Positively with correlated worry, anxiety, restlessness, fatigue, and lack of concentration; negatively correlated with happiness

**Loneliness:** Positively correlated with restlessness; negatively correlated with happiness
